# Supplementary material for: Nanoscale mapping of temperature-dependent conduction in an epitaxial VO2 film grown on an Al2O3 substrate
Source: Royal Society of Chemistry journal article supplement (doi:10.1039/d2ra02803d), 2022-01-01
Supplement: d2ra02803d1.pdf [file d2ra02803d1.pdf]

## Supplementary Material

### Nanoscale mapping of temperature-dependent conduction in an epitaxial VO<sub>2</sub> film grown on Al<sub>2</sub>O<sub>3</sub> substrate

Ahyoung Kim,<sup>a</sup> Soo Yeon Lim,<sup>a</sup> Jung Hyun Park,<sup>b</sup> Jin-Seok Chung,<sup>b</sup> Hyeonsik Cheong,<sup>a</sup>  
Changhyun Ko,<sup>c</sup> Jong-Gul Yoon,<sup>d</sup> and Sang Mo Yang<sup>\*a</sup>

<sup>a</sup>*Department of Physics, Sogang University, Seoul 04107, Republic of Korea*

<sup>b</sup>*Department of Physics, Soongsil University, Seoul 07027, Republic of Korea*

<sup>c</sup>*Department of Physics, Sookmyung Women's University, Seoul 04310, Republic of Korea*

<sup>d</sup>*Department of Physics, University of Suwon, Hwaseong, Gyeonggi-do 18323, Republic of Korea*

\**E-mail:* smyang@sogang.ac.kr

This file includes

Supplementary Figs. S1 – S3

## 1. C-AFM measurements under the nitrogen gas environment

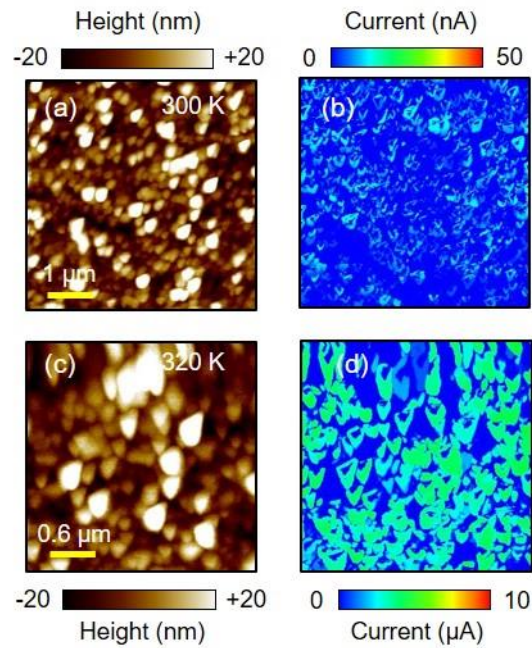

**FIG. S1.** Simultaneously obtained (a), (c) topography images and (b), (d) conductance maps under the nitrogen gas environment. The measured temperatures were (a), (b) 300 K and (c), (d) 320 K. The scan sizes were (a), (b)  $5 \times 5 \mu\text{m}^2$  and (c), (d)  $3 \times 3 \mu\text{m}^2$ . Note that similar donut patterns and their temperature-dependent evolution (i.e., the increases of current level and conductive region) were observed without any noticeable differences under the nitrogen gas environment.

## 2. $I$ - $V$ curves in the first Bayesian endmember

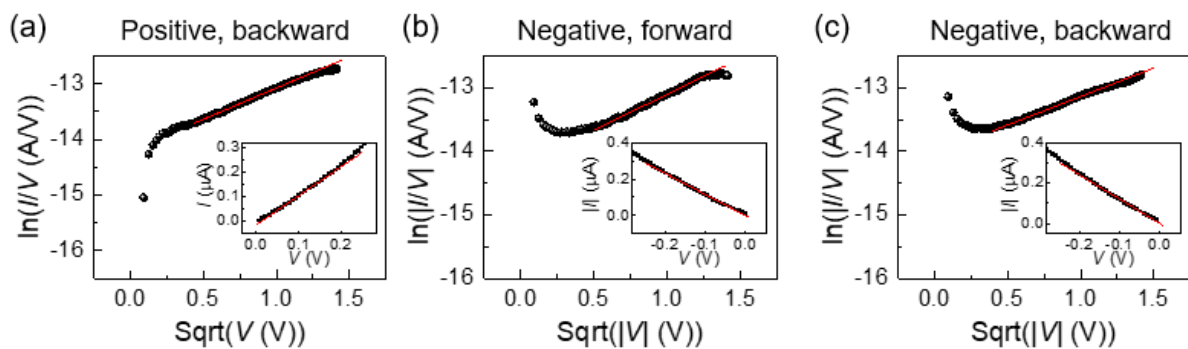

**FIG. S2.** The plots of  $\ln(I/V)$  versus  $\sqrt{V}$  of (a) the backward  $I$ - $V$  curve in the positive voltage region and (b) the forward and (c) backward  $I$ - $V$  curves in the negative voltage region of the first Bayesian endmembers. The insets in (a) – (c) show the current responses for the small voltage regions. The solid red lines in (a) – (c) correspond to the linear fitting results.

### 3. $I$ - $V$ curves in the second Bayesian endmember

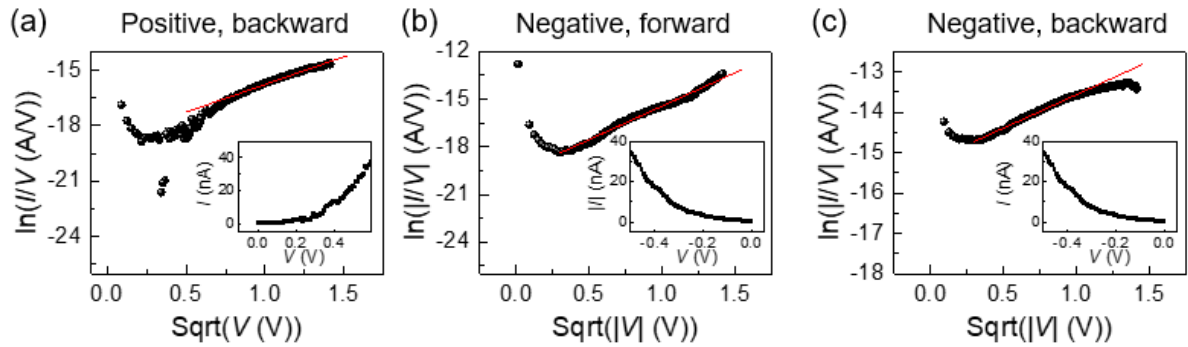

**FIG. S3.** The plots of  $\ln(I/V)$  versus  $\sqrt{V}$  of (a) the backward  $I$ - $V$  curve in the positive voltage region and (b) the forward and (c) backward  $I$ - $V$  curves in the negative voltage region of the second Bayesian endmembers. The insets in (a) – (c) show the current responses for the small voltage regions. The solid red lines in (a) – (c) are the linear fitting results.
